# Supplementary material for: Scavenger receptors and non-coding RNAs: relevance in atherogenesis
Source: Oxford University Press journal article supplement (doi:10.1093/cvr/cvv236), 2015-10-14

## **Supplement Figure**

### **Relationship between lncRNAs and atherosclerosis.**

Boxes, arrows, fonts, lines and question mark have the same meanings with Figure

1. Abbreviations: ADIPOR1, adiponectin receptor 1; VAMP3, vesicle-associated membrane protein 3; ANRIL, antisense non-coding RNA in the INK4 locus; VSMC, vascular smooth muscle cell; NFIA, nuclear factor IA; LDL-C, low density lipoprotein-cholesterol; VLDL-C, very low density lipoprotein-cholesterol; CR-P, the C-reactive protein; DYNLRB2-2, dynein light chain roadblock-type 2-2; GPR119, G protein-coupled receptor 119; GLP-1R, glucagon-like peptide 1 receptor; other abbreviations are same as Figure 1.

Supplementary Figure S1

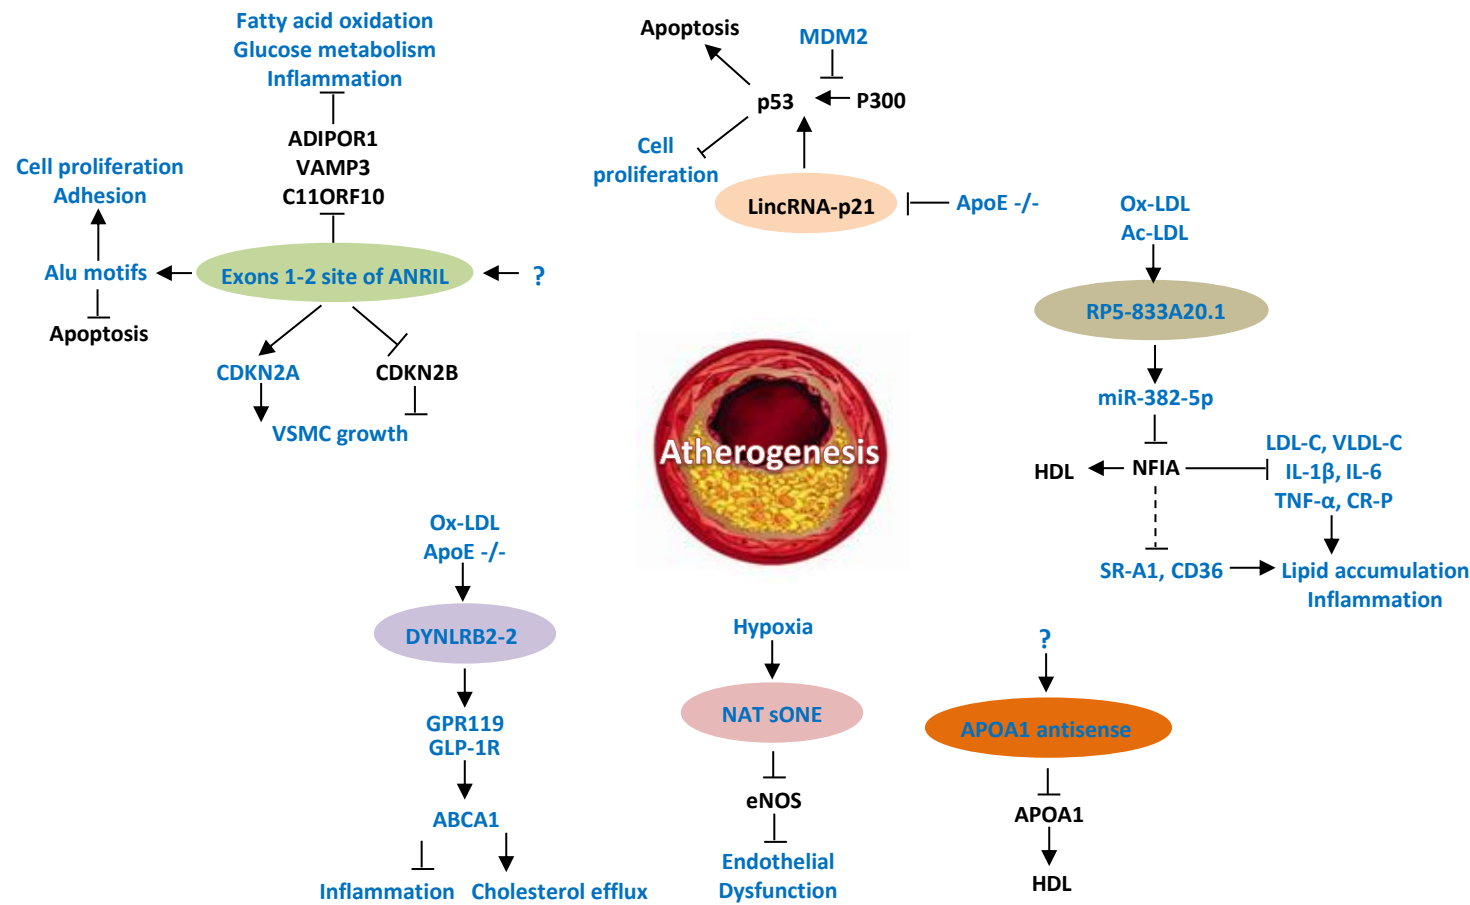

Supplement: cvv236_Supplementary_Data.zip [file cvv236_Supplementary_Data.zip]
